# Supplementary material for: Measuring Variant-Specific Neutralizing Antibody Profiles after Bivalent SARS-CoV-2 Vaccinations Using a Multivariant Surrogate Virus Neutralization Microarray
Source: MDPI journal article supplement (doi:10.3390/vaccines12010094), 2024-01-18
Supplement: s1 [file s1]

## Supplementary information

**Supplementary Table S1: Cohort characteristics**

| <b>Cohort</b>                            | <b>n</b> | <b>Female<br/>(n)</b> | <b>Age<br/>(median)</b> | <b>Age<br/>(min)</b> | <b>Age<br/>(max)</b> | <b>Days<br/>since<br/>last<br/>vacc./inf.<br/>(median)</b> | <b>Days<br/>since<br/>last<br/>vacc./inf.<br/>(min)</b> | <b>Days<br/>since<br/>last<br/>vacc./inf.<br/>(max)</b> |
|------------------------------------------|----------|-----------------------|-------------------------|----------------------|----------------------|------------------------------------------------------------|---------------------------------------------------------|---------------------------------------------------------|
| <b>2 x Vacc.-<br/>monov.</b>             | 11       | 9                     | 40                      | 20                   | 81                   | 20                                                         | 15                                                      | 34                                                      |
| <b>3 x Vacc.-<br/>monov.</b>             | 14       | 11                    | 45.5                    | 27                   | 64                   | 27.5                                                       | 15                                                      | 40                                                      |
| <b>4 x Vacc.-<br/>biv.<br/>(BA.1/WT)</b> | 9        | 4                     | 52                      | 38                   | 62                   | 21                                                         | 20                                                      | 28                                                      |
| <b>4 x Vacc.-<br/>biv.<br/>(BA.5/WT)</b> | 13       | 8                     | 50                      | 32                   | 57                   | 21                                                         | 21                                                      | 30                                                      |
| <b>WT infection</b>                      | 18       | 4                     | 48                      | 22                   | 77                   | 19.5                                                       | 11                                                      | 25                                                      |
| <b>Prepandemic<br/>control</b>           | 30       | 15                    | 23                      | 19                   | 55                   | /                                                          | /                                                       | /                                                       |

*Age in years, Days since last vacc./inf.: Days since last vaccination (vaccinated cohorts) or infection (WT infection cohort). /: not applicable.*

**Supplementary Table S2: Vaccination history**

| <b>Cohort</b>                       | <b>Vaccination history</b> | <b>n</b> |
|-------------------------------------|----------------------------|----------|
| <b>2 x Vacc.-monov.</b>             | P + P                      | 10       |
|                                     | P + P                      | 1        |
| <b>3 x Vacc.-monov.</b>             | P + P + P                  | 11       |
|                                     | P + P + M                  | 3        |
| <b>4 x Vacc.-biv.<br/>(BA.1/WT)</b> | P + P + P + P-BA.1         | 8        |
|                                     | AZ + AZ + P + P-BA.1       | 1        |
| <b>4 x Vacc.-biv.<br/>(BA.5/WT)</b> | P + P + P + P-BA.5         | 9        |
|                                     | J + P + P + P-BA.5         | 3        |
|                                     | AZ + AZ + P + P-BA.5       | 1        |
| <b>WT infection</b>                 | not vaccinated             | 18       |
| <b>Prepandemic control</b>          | not vaccinated             | 30       |

AZ: Astra-Zeneca “Vaxzevria” ChAdOx1; P: Monovalent Biontech/Pfizer “Comirnaty” BNT162b2; P-BA.1: Biontech/Pfizer Bivalent (WT/BA.1) BNT162b2 BA.1; P-BA.5: Biontech/Pfizer Bivalent (WT/BA.5) BNT162b2 BA.5, M: Moderna “Spikevax” mRNA-1273. n: number.

**Supplementary Table S3: sVNT cutoff values obtained by ROC and Youden’s Index**

|              | <b>Cutoff value</b> | <b>Sensitivity</b> | <b>Specificity</b> |
|--------------|---------------------|--------------------|--------------------|
| <b>WT</b>    | 26                  | >99 %              | >99 %              |
| <b>Delta</b> | 43                  | >99 %              | >99 %              |
| <b>BA.1</b>  | 24                  | 92 %               | 78 %               |
| <b>BA.2</b>  | 9                   | 91 %               | 87 %               |
| <b>BA.5</b>  | 28                  | 88 %               | 92 %               |

**Supplementary Table S4: Pairwise cohortwise-comparisons of variant/WT ratios (Wilcoxon test)**

| <b>Ratio</b>    | <b>Cohort</b>                       | <b>WT infection</b> | <b>2 x Vacc.-<br/>monov.</b> | <b>3 x Vacc.-<br/>monov.</b> | <b>4 x Vacc.-biv.<br/>(BA.1/WT)</b> |
|-----------------|-------------------------------------|---------------------|------------------------------|------------------------------|-------------------------------------|
| <b>Delta/WT</b> | <b>2 x Vacc.-<br/>monov.</b>        | n.S.                |                              |                              |                                     |
|                 | <b>3 x Vacc.-<br/>monov.</b>        | ***                 | ****                         |                              |                                     |
|                 | <b>4 x Vacc.-biv.<br/>(BA.1/WT)</b> | **                  | ***                          | n.S.                         |                                     |
|                 | <b>4 x Vacc.-biv.<br/>(BA.5/WT)</b> | **                  | ***                          | n.S.                         | n.S.                                |
| <b>BA.1/WT</b>  | <b>2 x Vacc.-<br/>monov.</b>        | **                  |                              |                              |                                     |
|                 | <b>3 x Vacc.-<br/>monov.</b>        | n.S.                | n.S.                         |                              |                                     |
|                 | <b>4 x Vacc.-biv.<br/>(BA.1/WT)</b> | n.S.                | ***                          | *                            |                                     |
|                 | <b>4 x Vacc.-biv.<br/>(BA.5/WT)</b> | *                   | ****                         | **                           | n.S.                                |
| <b>BA.2/WT</b>  | <b>2 x Vacc.-<br/>monov.</b>        | n.S.                |                              |                              |                                     |
|                 | <b>3 x Vacc.-<br/>monov.</b>        | ****                | ****                         |                              |                                     |
|                 | <b>4 x Vacc.-biv.<br/>(BA.1/WT)</b> | ****                | ****                         | n.S.                         |                                     |
|                 | <b>4 x Vacc.-biv.<br/>(BA.5/WT)</b> | ****                | ****                         | n.S.                         | n.S.                                |
| <b>BA.5/WT</b>  | <b>2 x Vacc.-<br/>monov.</b>        | n.S.                |                              |                              |                                     |
|                 | <b>3 x Vacc.-<br/>monov.</b>        | n.S.                | n.S.                         |                              |                                     |
|                 | <b>4 x Vacc.-biv.<br/>(BA.1/WT)</b> | n.S.                | n.S.                         | n.S.                         |                                     |
|                 | <b>4 x Vacc.-biv.<br/>(BA.5/WT)</b> | ***                 | ***                          | **                           | n.S.                                |

\*\*\*\* p < 0.0001, \*\*\* p < 0.001, \*\* p < 0.01, \* p < 0.05, n.s.: not significant (p > 0.05) in pairwise Wilcoxon signed rank tests comparing the variant / WT ratios between cohorts for each variant (multiplicity adjusted using Bonferroni-Holm within each variant).

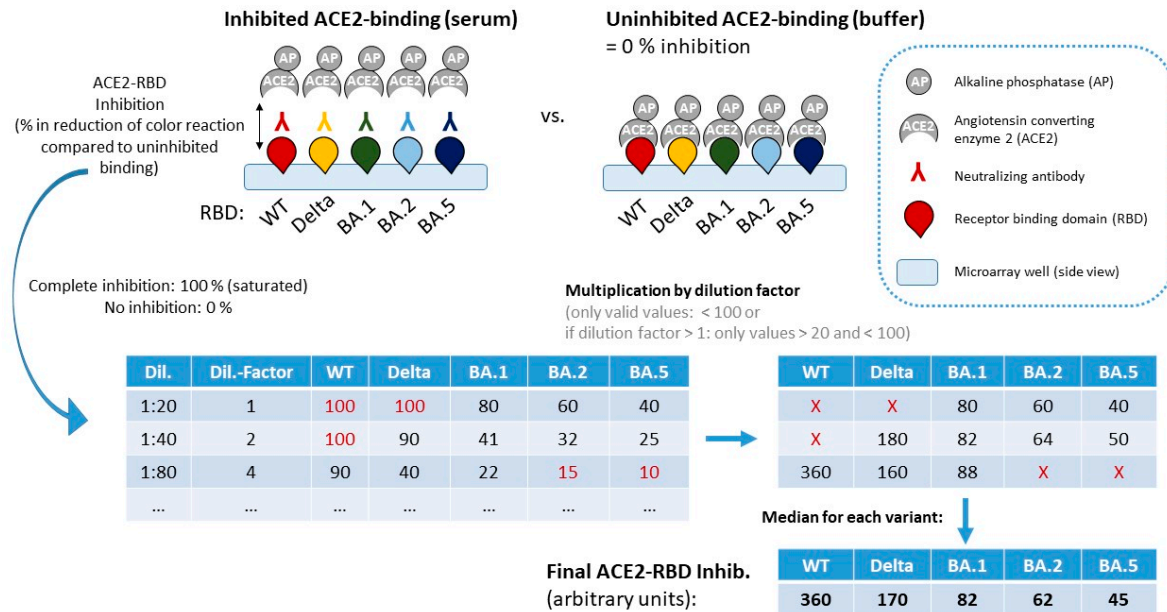

### Supplementary Figure S1: Schematic overview of the sVNT result calculation

ACE2-RBD inhibition was obtained by measuring the reduction in binding of ACE2-AP to recombinant variant RBDs in the presence/absence of serum neutralizing antibodies relative to the control well (buffer). A value of 100 indicated total inhibition (i.e. no binding and no color reaction). This was repeated at serial two-fold dilutions of 1:20 up to 1:360 for each serum, and, additionally up to 1:2560 in some cases. Next, all valid values (i.e. not oversaturated (= 100) for all dilutions and not below 20 for all dilutions except 1:20) were corrected for the dilution relative to 1:20 (i.e. multiplication by the dilution factor relative to 1:20). Invalid values are indicated in red font. Finally, the median of all valid values was calculated for each variant. Due to the dilution correction, values above 100 can occur; thus, the results are given in arbitrary units instead of % inhibition. ACE2-AP: Angiotensin converting enzyme 2 bound to alkaline phosphatase, Dil.: dilution; Dil.-Factor: dilution factor; RBD: receptor binding domain, WT: wildtype.

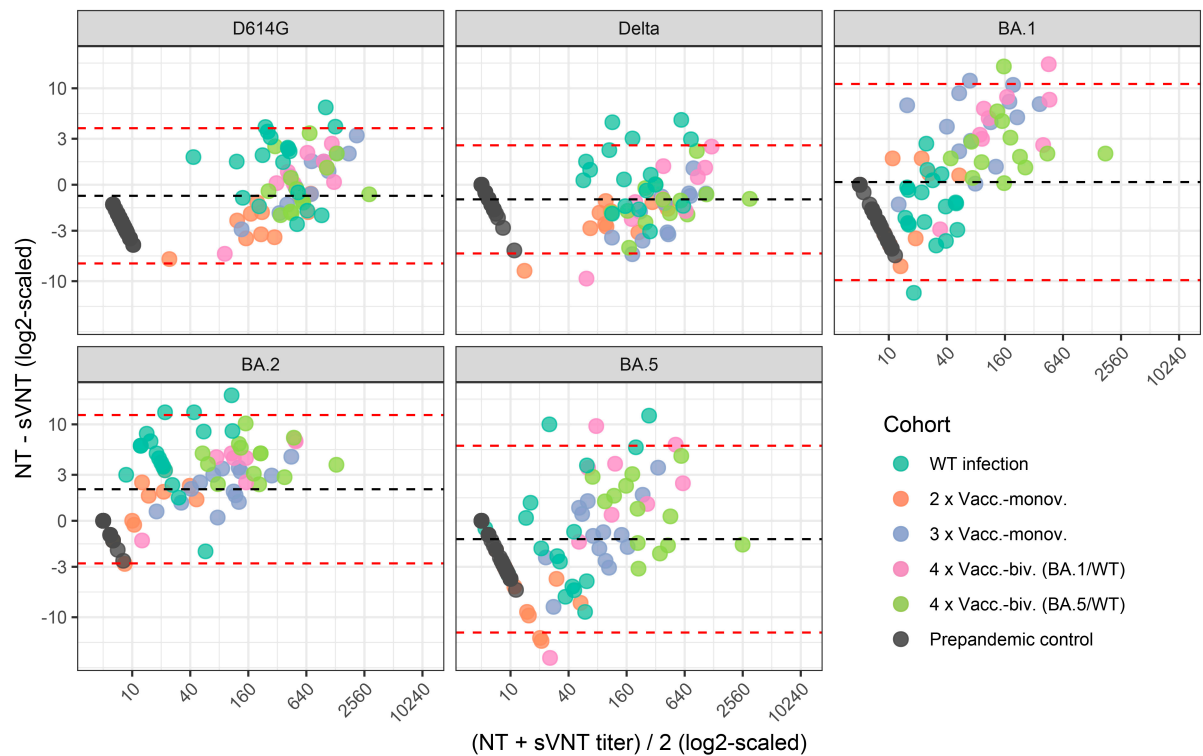

### Supplementary Figure S2: Bland-Altman analysis

The panels display the virus variants against which neutralizing activity was measured using a sVNT and NT. The x-axis shows the mean result (“titer”) of the two measurement methods (mean calculated after log2-transformation). The y-axis shows the difference between the two measurement methods (also calculated after log2-transformation). Each serum is represented by one dot (color coded for the cohorts). The black dotted line indicates the mean and the red lines indicate the 95% agreement intervals. biv.: bivalent; NT: neutralization test; sVNT: surrogate virus neutralization test; Vacc.: vaccinated; WT: wildtype.
